# Supplementary material for: Spatiotemporal dynamics of cellulose during enzymatic hydrolysis studied by infrared spectromicroscopy
Source: Royal Society of Chemistry journal article supplement (doi:10.1039/d3gc03279e), 2023-11-28
Supplement: d3gc03279e5.pdf [file d3gc03279e5.pdf]

## **Supplementary Material 5: Comparing peak intensities of cellulose peaks – LOI and HBI**

### **Spatiotemporal dynamics of cellulose during enzymatic hydrolysis studied by infrared spectromicroscopy**

Tina Jeoh<sup>1,\*</sup>, Jennifer Danger Nill<sup>1,2,§</sup>, Wujun Zhao<sup>3,4,§</sup>, Sankar Raju Narayanasamy<sup>3,5,§</sup>, Liang Chen<sup>3,6</sup>, and Hoi-Ying N. Holman<sup>3,\*</sup>

<sup>§</sup>These authors contributed equally to this manuscript

<sup>1</sup>Biological and Agricultural Engineering, University of California Davis, Davis, CA

<sup>2</sup>Current: Amyris, Emeryville, CA

<sup>3</sup>Berkeley Synchrotron Infrared Structure Biology (BSISB), Lawrence Berkeley National Lab (LBNL), Berkeley, CA

<sup>4</sup>Current: Genus IntelliGen Technologies, Windsor, Wisconsin

<sup>5</sup>Current: Biosciences and Biotechnology Division, Physical and Life Science, Lawrence Livermore National Laboratory, Livermore, CA

<sup>6</sup>Current: TikTok, Mountain View, California

\*Corresponding Authors

#### **Lateral Order Index (LOI)**

The lateral order index (LOI) is calculated as the ratio of peak intensities at  $1429\text{ cm}^{-1}$  and  $896\text{ cm}^{-1}$  (Figure S5. 1). The ‘amorphous cellulose’ signal at  $\sim 896\text{ cm}^{-1}$  is consistently near zero such that the  $\text{LOI} \gg 1$ .

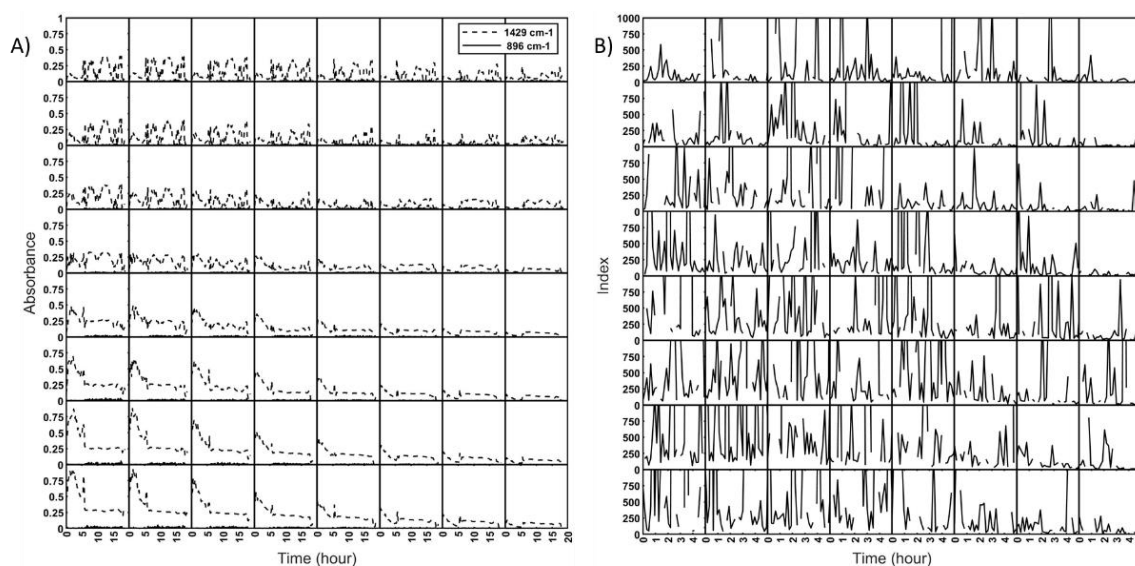

Figure S5. 1: (A) Peak intensities at  $1429\text{ cm}^{-1}$  and  $896\text{ cm}^{-1}$  over full time course, (B) LOI ( $1429\text{ cm}^{-1}/896\text{ cm}^{-1}$ ).

### Hydrogen Bonding Index (HBI)

An alternate assessment of the hydrogen bonding index (HBI) is to take the ratio of the peak intensities at  $3345\text{ cm}^{-1}$  and  $1429\text{ cm}^{-1}$ . This assessment of HBI compares the intensity of the vibration peak of the hydrogen bonds that C6-O6H participates in ( $3345\text{ cm}^{-1}$ ) and the bending peak of C6-O6H ( $1429\text{ cm}^{-1}$ ). The  $1429\text{ cm}^{-1}$  peak, also used in assessing LOI, is associated with the  $\delta\text{OH}$  of C6-O6H. Comparing the signal due to hydrogen bonds that the C6-O6H participates in and the signal due to bending of the C6-O6H indicated a steeper decrease in the abundance of the C6-O6H bond than in hydrogen bonding by these bonds. Similar increasing trends in the ratios at the particle edges were thus observed as HBI (Figure 9D in the main manuscript)

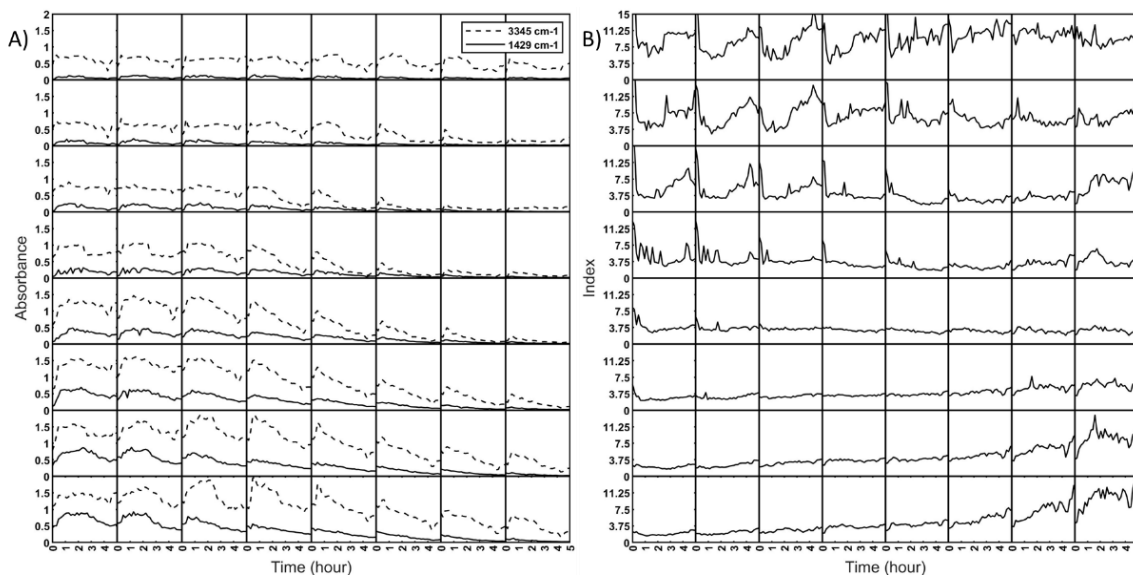

Figure S5. 2: (A) Peak intensities at  $3345\text{ cm}^{-1}$  and  $1429\text{ cm}^{-1}$  over first 5 hours, (B) HBI ( $3345\text{ cm}^{-1}/1429\text{ cm}^{-1}$ ).
